# Supplementary material for: Selective focused-ion-beam sculpting of TiO2nanotubes and mechanism understanding
Source: Royal Society of Chemistry journal article supplement (doi:10.1039/c2cp43354k), 2012-12-05
Supplement: c2cp43354k.pdf [file c2cp43354k.pdf]

## Supporting Information

### Calculation details:

According to thermal spike theory, the temperature distribution in cylindrical coordinates related to a bombarded spot is: <sup>1-2</sup>

$$T(F_d, r, t, T_s) = \frac{F_d}{4\pi\kappa t} \exp(-\rho C r^2 / 4\kappa t) + T_s \quad (S1)$$

where  $F_d$  is the energy deposited into the track per unit length,  $\kappa$  is the thermal conductivity of TiO<sub>2</sub> (11.7 W/m/k),  $\rho$  is the density of TiO<sub>2</sub> (3.8 g/cm<sup>3</sup>),  $C$  is the heat capacity of TiO<sub>2</sub> (57.12 J/mol/K),  $t$  is the relaxation time,  $r$  is the related distance to the bombarded spot, and  $T_s$  is the substrate temperature.<sup>3</sup>

As a result, the viscosity on the substrate surface decreases due to thermal activation:

$$\eta_{thermal} = \eta_0 \exp(E_{flow} / kT) \quad (S2)$$

where  $\eta_0$  is a material dependent prefactor,  $E_{flow}$  is the activation energy for flow, and  $k$  is Boltzmann's constant. We can use the first order estimates for  $\eta_0$  and  $E_{flow}$ :  $\eta_0 = 10^{-3}$  Pa·s and  $E_{flow} = 1.0$  eV. Subsequently, the shear stress can relax in the locally heated region at a rate of  $R = \mu / \eta_{thermal}$  (where  $\mu$  is shear modulus at a value of 90 GPa),<sup>3</sup> and the temperature is cooled back to the substrate temperature. The total amount of stress relaxation up to a time  $\tau$  is:

$$\Omega(F_d, r, \tau, T_s) = 1 - \exp\left[\int_0^\tau -R(F_d, r, t, T_s) dt\right] \quad (S3)$$

The ion-induced viscosity  $\eta$  can be calculated by the cross section  $\theta_{eff}(F_d, T_s)$  of full stress relaxation:

$$\eta_{rad} = \frac{\mu}{3B\theta_{eff}(F_d, T_s)} = \frac{\mu}{3B \int_0^{2\pi} \int_0^\infty \Omega(F_d, r, \infty, T_s) r dr d\theta} \quad (S4)$$

$$\eta = \frac{\eta_{rad}}{f} \quad (S5)$$

where  $B$  is dependent on Poisson's ratio  $\nu$  by:  $B = 6(1-\nu)/(5-4\nu)$ ,  $f$  is the ion flux. Poisson's ratio  $\nu$  for TiO<sub>2</sub> is 0.28.<sup>3</sup>

As shown in Fig. S1, for 30 kV FIB sculpting, the total amount of stress relaxation at 1 ps overlaps with those of 10 ps and when  $\tau \rightarrow \infty$ , which means the stress has almost

completely relaxed at a time scale of picosecond. Similarly, the time scale of stress relaxation for 2 kV-16 kV FIB sculpting is also picosecond. Monte Carlo simulation by SRIM shows  $F_d$  is 1.89 kV/nm, 1.6 kV/nm, 1.27 kV/nm, 1.06 kV/nm, and 0.71 kV/nm for 30 kV, 16 kV, 8 kV, 5 kV, and 2 kV Ga<sup>+</sup> beam sculpting, respectively.<sup>4</sup> Therefore, the temperature distribution at local thermal spikes under 2 kV-30 kV FIB sculpting can be calculation by equation (S1) as shown in Fig. 5.

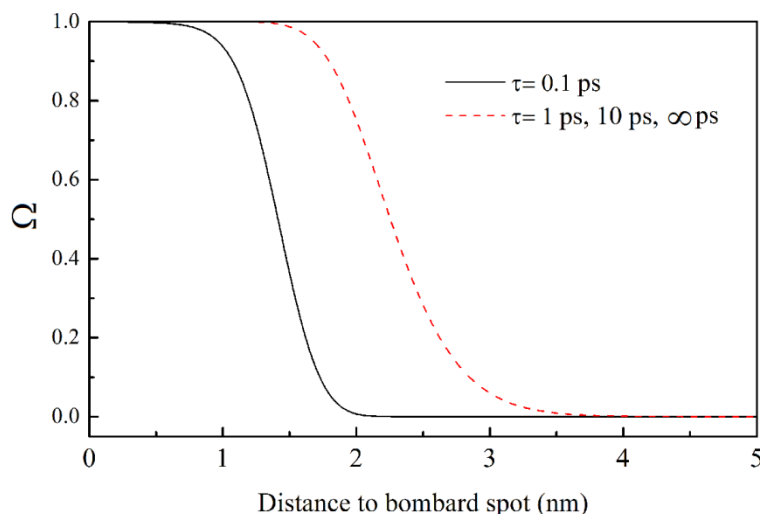

Fig. S1. Calculations of the total amount of stress relaxation at  $T_s = 300$  K up to time  $\tau$ : 0.1 ps, 1 ps, 10 ps, and  $\infty$ .

#### References:

1. M. L. Brongersma, E. Snoeks and A. Polman, *Appl. Phys. Lett.*, 1997, **71**, 1628.
2. H. Trinkaus, *J. Nuclear Mater.*, 1995, **223**, 196.
3. J. F. Shackelford and W. Alexander, *CRC Press*, 2001.
4. J. F. Ziegler, J. P. Biersack and U. Littmark, *The Stopping and Range of Ions in Solids*. Pergamon: New York, 2008.
